# Supplementary material for: A test of context- and sex-dependent dopaminergic effects on the behavior of a gregarious bird, the common waxbill, Estrilda astrild
Source: Oxford University Press journal article supplement (doi:10.1242/jeb.243861), 2022-02-24
Supplement: jeb243861supp.pdf [file jeb243861supp.pdf]

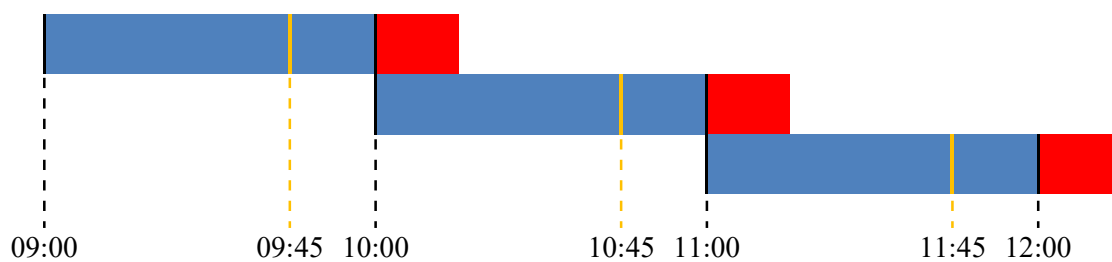

**Fig. S1.** Timeline of experimental procedures and behavioral tests. Each of the three horizontal lines is one of three birds tested on the same day. Blue indicates the food deprivation period, and red indicates the test of competition over food. The yellow line indicates time of injection.

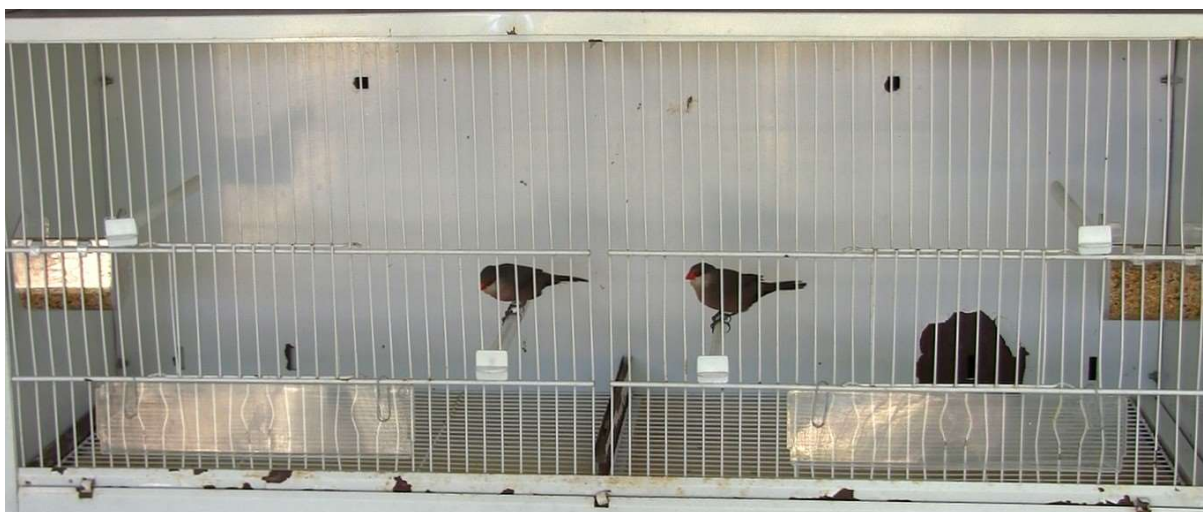

**Fig. S2.** Cage used for behavioural tests, identical to the home cages and located side-by-side with them. The test cage contained four perches in symmetrical positions, similarly to the home cages, plus two feeders, one placed next to the rightmost perch, and the other next to the leftmost perch.

**Table S1.** Distribution of treatments (control, D2R agonist and D2R antagonist) across the 11 experimental birds. Different tests to the same bird treatments were separated in time by seven days. Experiments took place during mornings, between 09:00 am and 12:30 pm, from the 22nd July to the 5th September 2019.

| Round | Day | Cage | Sex    | Bird tested | Companion bird | Treatment     |
|-------|-----|------|--------|-------------|----------------|---------------|
| 1     | 1   | 1    | Male   | 24B         | 117A           | D2 Agonist    |
|       |     | 5    | Female | 118A        |                | D2 Antagonist |
|       |     | 3    | Male   | 34P         | 26B            | Control       |
|       | 2   | 4    | Female | 32P         |                | D2 Agonist    |
|       |     | 2    | Male   | 122AB       | 123A           | D2 Antagonist |
|       |     | 6    | Female |             |                |               |
|       | 3   | 1    | Female | 28P         | 13V            | D2 Agonist    |
|       |     | 5    | Male   | 113AB       |                | D2 Antagonist |
|       |     | 3    | Female | 31A         | 4V             | Control       |
|       | 4   | 4    | Male   | 116A        |                | D2 Agonist    |
|       |     | 2    | Female | 35P         | 30V            | D2 Antagonist |
|       |     | 6    | Male   | 115A        |                | Control       |
| 2     | 1   | 1    | Male   | 24B         |                | D2 Antagonist |
|       |     | 5    | Female | 118A        | 14V            | Control       |
|       |     | 3    | Male   | 34P         |                | D2 Agonist    |
|       | 2   | 4    | Female | 32P         | 17V            | D2 Antagonist |
|       |     | 2    | Male   | 122AB       |                | Control       |
|       |     | 6    | Female |             | 37B            |               |
|       | 3   | 1    | Female | 28P         |                | D2 Antagonist |
|       |     | 5    | Male   | 113AB       | 38P            | Control       |
|       |     | 3    | Female | 31A         |                | D2 Agonist    |
|       | 4   | 4    | Male   | 116A        | 27B            | D2 Antagonist |
|       |     | 2    | Female | 35P         |                | Control       |
|       |     | 6    | Male   | 115A        | 11P            | D2 Agonist    |

**Table S1.** (continued)

| Round | Day | Cage | Sex    | Bird tested | Companion bird | Treatment     |
|-------|-----|------|--------|-------------|----------------|---------------|
| 3     | 1   | 1    | Male   | 24B         | 117A           | Control       |
|       |     | 5    | Female | 118A        |                | D2 Agonist    |
|       |     | 3    | Male   | 34P         | 26B            | D2 Antagonist |
|       | 2   | 4    | Female | 32P         |                | Control       |
|       |     | 2    | Male   | 122AB       | 123A           | D2 Agonist    |
|       |     | 6    | Female |             |                |               |
|       | 3   | 1    | Female | 28P         | 13V            | Control       |
|       |     | 5    | Male   | 113AB       |                | D2 Agonist    |
|       |     | 3    | Female | 31A         | 4V             | D2 Antagonist |
|       | 4   | 4    | Male   | 116A        |                | Control       |
|       |     | 2    | Female | 35P         | 30V            | D2 Agonist    |
|       |     | 6    | Male   | 115A        |                | D2 Antagonist |
| 4     | 1   | 1    | Male   | 24B         |                | D2 Agonist    |
|       |     | 5    | Female | 118A        | 14V            | D2 Antagonist |
|       |     | 3    | Male   | 34P         |                | Control       |
|       | 2   | 4    | Female | 32P         | 17V            | D2 Agonist    |
|       |     | 2    | Male   | 122AB       |                | D2 Antagonist |
|       |     | 6    | Female |             | 37B            |               |
|       | 3   | 1    | Female | 28P         |                | D2 Agonist    |
|       |     | 5    | Male   | 113AB       | 38P            | D2 Antagonist |
|       |     | 3    | Female | 31A         |                | Control       |
|       | 4   | 4    | Male   | 116A        | 27B            | D2 Agonist    |
|       |     | 2    | Female | 35P         |                | D2 Antagonist |
|       |     | 6    | Male   | 115A        | 11P            | Control       |
| 5     | 1   | 1    | Male   | 24B         | 117A           | D2 Antagonist |
|       |     | 5    | Female | 118A        |                | Control       |
|       |     | 3    | Male   | 34P         | 26B            | D2 Agonist    |
|       | 2   | 4    | Female | 32P         |                | D2 Antagonist |
|       |     | 2    | Male   | 122AB       | 123A           | Control       |
|       |     | 6    | Female |             |                |               |
|       | 3   | 1    | Female | 28P         | 13V            | D2 Antagonist |
|       |     | 5    | Male   | 113AB       |                | Control       |
|       |     | 3    | Female | 31A         | 4V             | D2 Agonist    |
|       | 4   | 4    | Male   | 116A        |                | D2 Antagonist |
|       |     | 2    | Female | 35P         | 30V            | Control       |
|       |     | 6    | Male   | 115A        |                | D2 Agonist    |
| 6     | 1   | 1    | Male   | 24B         |                | Control       |
|       |     | 5    | Female | 118A        | 14V            | D2 Agonist    |
|       |     | 3    | Male   | 34P         |                | D2 Antagonist |
|       | 2   | 4    | Female | 32P         | 17V            | Control       |
|       |     | 2    | Male   | 122AB       |                | D2 Agonist    |
|       |     | 6    | Female |             | 37B            |               |
|       | 3   | 1    | Female | 28P         |                | Control       |
|       |     | 5    | Male   | 113AB       | 38P            | D2 Agonist    |
|       |     | 3    | Female | 31A         |                | D2 Antagonist |
|       | 4   | 4    | Male   | 116A        | 27B            | Control       |
|       |     | 2    | Female | 35P         |                | D2 Agonist    |
|       |     | 6    | Male   | 115A        | 11P            | D2 Antagonist |

**Table S2.** GLMM contrasts between behavior (activity or aggressiveness) in control conditions and following each of the dopaminergic manipulations, separately for females and males. The reference level for the factor treatment is the “control” and comparison levels are D2 agonist and D2 antagonist, and for the factor social context the reference level is “alone” and the comparison level is “with companion”, n = 11.

|                                            | Estimate                      | Z value (P)           | Estimate                    | Z value (P)  |
|--------------------------------------------|-------------------------------|-----------------------|-----------------------------|--------------|
|                                            | <b>Activity Females</b>       |                       | <b>Activity Males</b>       |              |
| Contrasts with control treatment:          |                               |                       |                             |              |
| D2 Agonist                                 | -1.11                         | -2.47 ( <b>0.01</b> ) | 0.31                        | 0.55 (0.58)  |
| D2 Antagonist                              | -0.12                         | -0.27 (0.79)          | 0.60                        | 1.06 (0.29)  |
| Contrast with the alone social treatment:  |                               |                       |                             |              |
| With companion                             | -0.10                         | -0.23 (0.82)          | 0.04                        | 0.06 (0.95)  |
| 2-way interactions with DAergic treatment: |                               |                       |                             |              |
| D2 Agonist x with companion                | 0.16                          | 0.25 (0.80)           | 0.16                        | 0.20 (0.84)  |
| D2 Antagonist x with companion             | -0.52                         | -0.82 (0.41)          | 0.34                        | 0.43 (0.67)  |
|                                            | <b>Aggressiveness Females</b> |                       | <b>Aggressiveness Males</b> |              |
| Contrasts with control treatment:          |                               |                       |                             |              |
| D2 Agonist                                 | -0.98                         | -1.45 (0.15)          | -1.39                       | -1.75 (0.08) |
| D2 Antagonist                              | 0.49                          | 1.08 (0.28)           | -1.39                       | -1.75 (0.08) |
